# Supplementary material for: Let-7i Reduces Aggressive Phenotype and Induces BRCAness in Ovarian Cancer Cells
Source: MDPI journal article supplement (doi:10.3390/cancers13184617), 2021-09-15
Supplement: s1 [file s1]

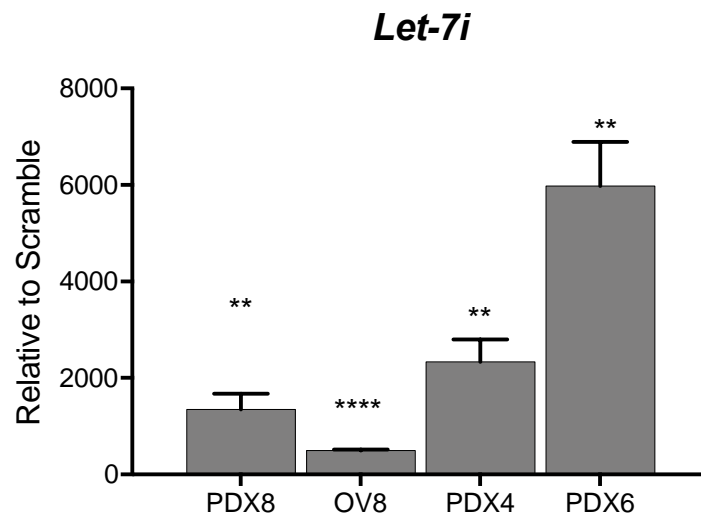

**Figure S1.** Let-7i transfection Lipofectamine transfection of let-7i mimic resulted in up-regulation of mature let-7i relative to scramble control. Let-7i levels in parental cells relative to each other have been previously described 1. Error bars: SEM. \*\* $p \leq 0.01$ , \*\*\*\* $p \leq 0.0001$ .  $p$  Value  $\leq 0.05$  was considered significant.

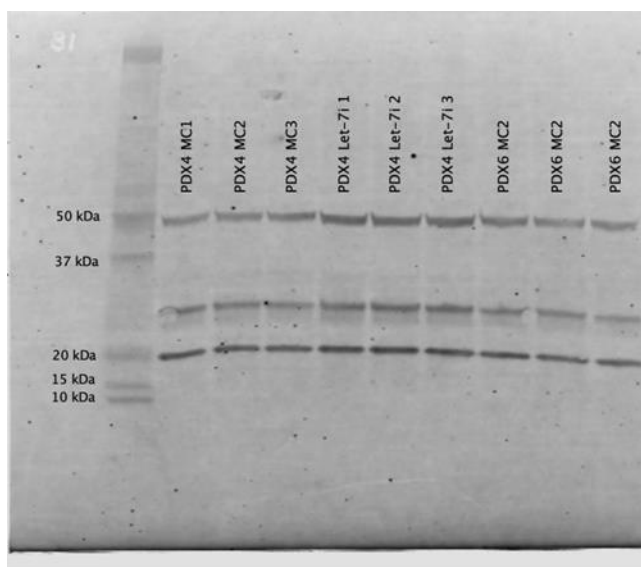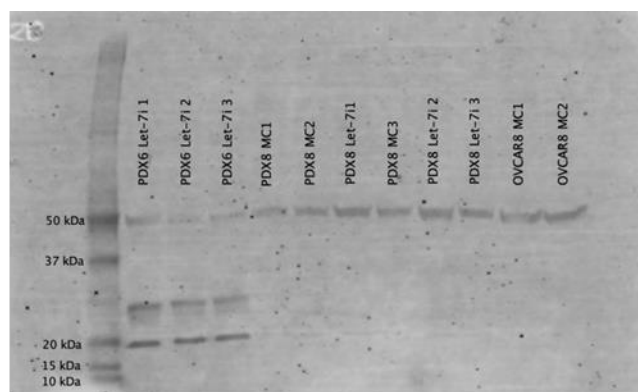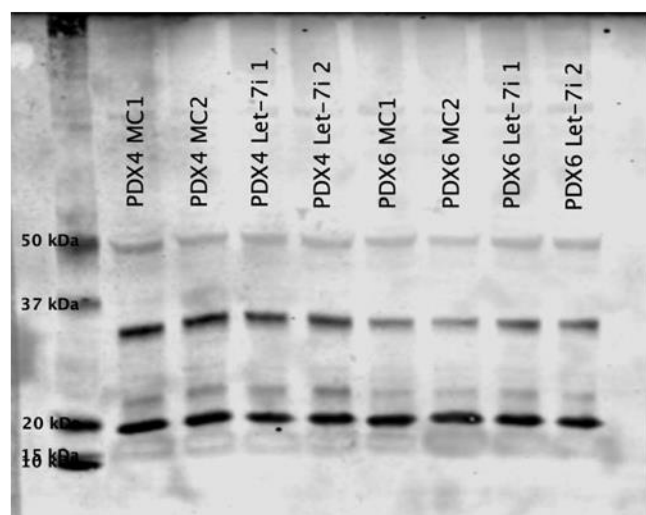

**Figure S2.** Full images of Western Blots staining for Tubulin, LIN28A, and HMGA2.

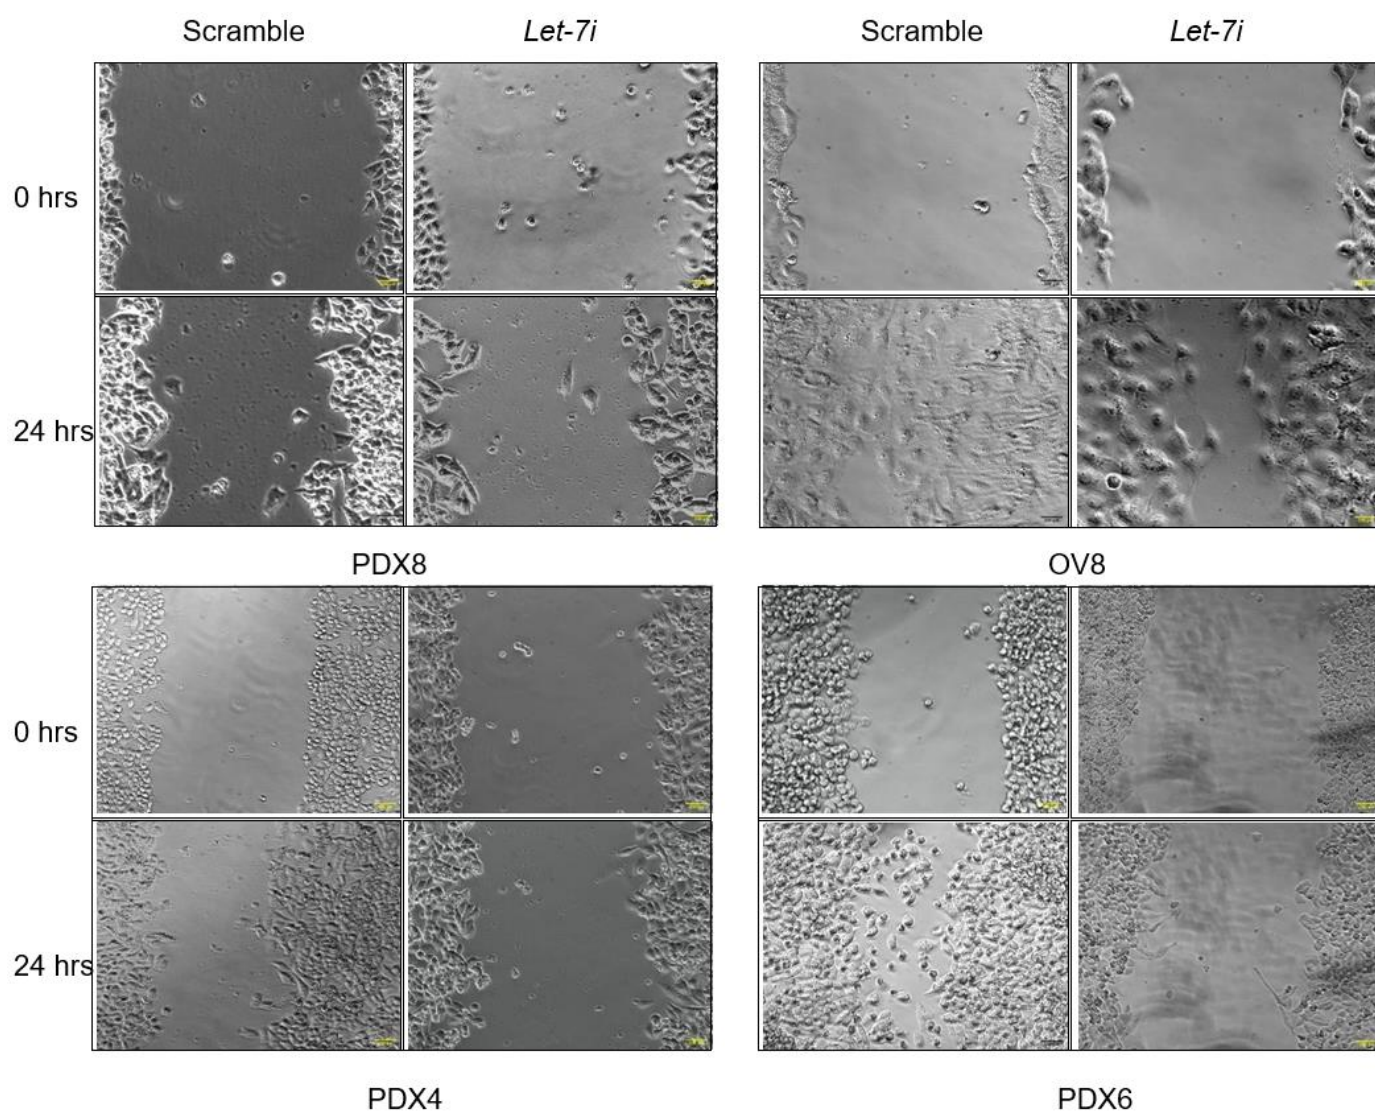

**Figure S3.** Images from wound healing assays. Representative images from control (Scramble) and *let-7i* overexpression for four cell types is shown.

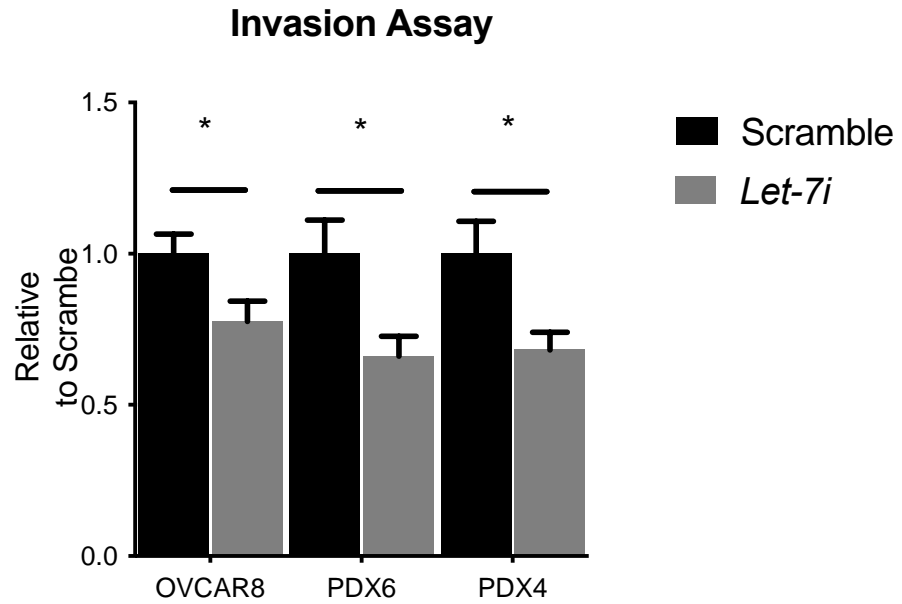

**Figure S4.** *Let-7* reduces invasion. Invasion assay performed 48 hours post *let-7i* over-expression. Error bars: SE. \* $p \leq 0.05$ .  $p$  Value  $\leq 0.05$  was considered significant.

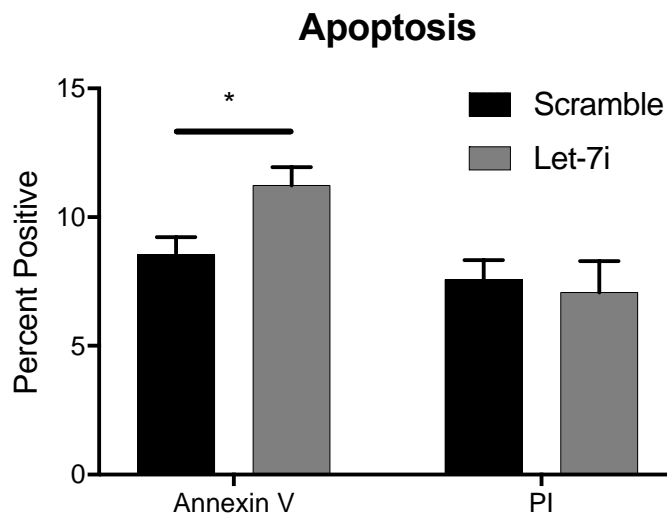

**Figure S5.** *Let-7i* increases apoptosis. Flow cytometry analysis was performed 48 hours post *let-7i* over-expression in OVCAR8 cells and stained for Annexin V and PI to assess apoptosis. Error bars: SE. \* $p \leq 0.05$ .  $p$  Value  $\leq 0.05$  was considered significant.

**A**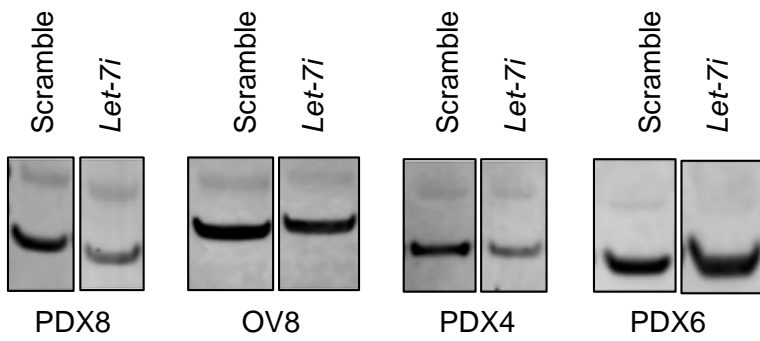**B****cMYC Protein Level**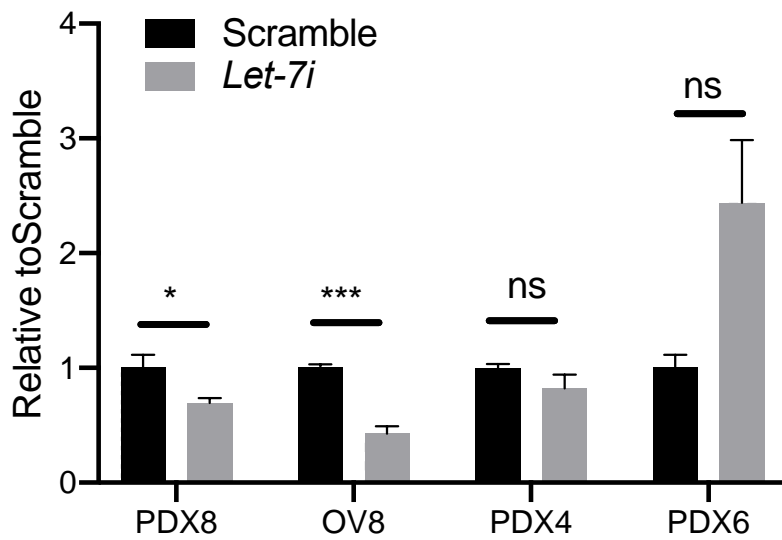

**Figure S6.** Let-7 effect on cMYC protein level. Let-7 OE resulted in cMYC repression in PDX8 and OV8 while having no effect on PDX4 and PDX6. \* $p \leq 0.05$ , \*\*\* $p \leq 0.001$ . ns, not significant.  $p$  value  $\leq 0.05$  was considered significant.

|              |                          |
|--------------|--------------------------|
| Beta Actin F | TGAAGTGTGACGTGGACA TC    |
| Beta Actin R | GGAGGAGCAATGATCTTGAT     |
| kRAS F       | CCCAGGTGCGGGAGAGA        |
| kRAS R       | TCAAGGCACTCTTGCCTACG     |
| MYC F        | ACTCTGAGGAGGAACAAGAA     |
| MYC R        | TGGAGACGTGGCACCTCTT      |
| E2F1 F       | ACGCTATGAGACCTCACTGAA    |
| E2F1 R       | TCCTGGGTCAACCCCTCAAG     |
| LIN28A F     | GAGCATGCAGAAGCGCAGATCAA  |
| LIN28A R     | TATGGCTGATGCTCTGGCAGAAGT |
| IGF1 F       | GCTCTTCAGTTCGTGTGTGGA    |
| IGF1 R       | CGACTGCTGGAGCCATACC      |
| HMGA2 F      | AAAACGGCCAAGAGGCAGAC     |
| HMGA2 R      | ATGTCTCTTCAGTCTCCTGAGCA  |

**Table S1.** RT-qPCR Primers. Sequences of forward and reward primers used for mRNA quantification.
